# Supplementary material for: Oxidatively Modified LDL Suppresses Lymphangiogenesis via CD36 Signaling
Source: PubMed Central journal article supplement (PMC7926875; doi:10.3390/antiox10020331), 2021-02-23
Supplement: antioxidants-10-00331-s001.pdf [file antioxidants-10-00331-s001.pdf]

**Supplementary Table 1: List of primers used for mRNA quantitation using quantitative real-time PCR.**

| <b>Gene name</b>   | <b>Primer sequences</b>                                                         |
|--------------------|---------------------------------------------------------------------------------|
| <b>Human Lox1</b>  | F 5'- CTC CTT TGA TGC CCC ACT TA -3'<br>R 5'- TTT CCG CAT AAA CAG CTC CT -3'    |
| <b>Human SR-A1</b> | F 5'- GCA GTT CTC ATC CCT CTC AT -3'<br>R 5'- TCT TCG TTT CCC ACT TCA GG -3'    |
| <b>Human SR-B1</b> | F 5'- TTT GAA GGC ATC CCC ACC TA -3'<br>R 5'- TGA ATT CCA GAC TCC AGG CAC -3'   |
| <b>Human CD36</b>  | F 5'- CTT TGG CTT AAT GAG ACT GGG AC-3'<br>R 5'- GCA ACA AAC ATC ACC ACA CCA-3' |

## Supplementary Figure S1

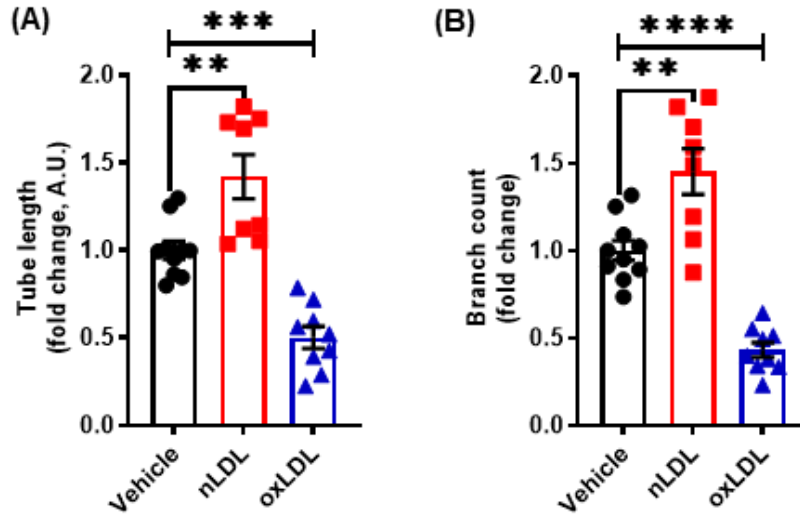

**Supplementary Figure S1. Oxidized LDL suppresses lymphangiogenesis *in vitro*.** (A-B) Human LEC in basal media MV2 (0.5% FBS) containing vehicle, nLDL (50  $\mu\text{g}/\text{mL}$ ) or oxLDL (50  $\mu\text{g}/\text{mL}$ ) were seeded in wells of a Matrigel-coated plate and tube formation determined after 6 h. Quantification of tube length (A) and the number of branching points (B) are shown ( $n = 8-10$ ). Data represented the mean  $\pm$  SEM. \*\* $p < 0.01$ ; \*\*\* $p < 0.005$ .

## Supplementary Figure S2

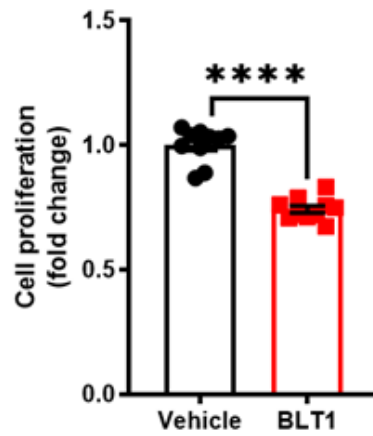

**Supplementary Figure S2. BLT1 treatment inhibits LEC proliferation.** Human LEC were treated with vehicle or BLT1 (10  $\mu$ M) for 48 h and cell proliferation determined using WST-1 assay ( $n = 10$ ). Data represented the mean  $\pm$  SEM. \*\*\*\*  $p < 0.001$ .

### Supplementary Figure S3

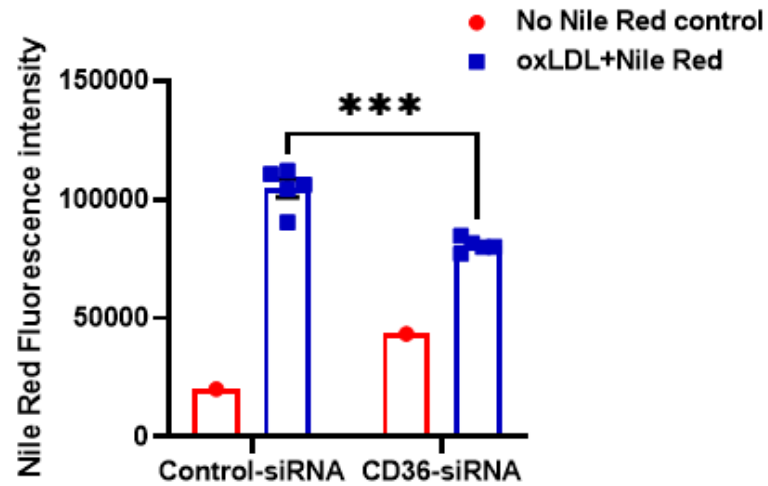

**Supplementary Figure 3. CD36 mediates oxLDL uptake by LEC.** Human LEC were transfected with control- or CD36-siRNA. After 48 h, cells were treated with oxLDL for 24 h. Cells were stained with Nile Red (50 ng/mL, 7 min) and FACS analysis performed to determine lipid uptake.

### Supplementary Figure S4

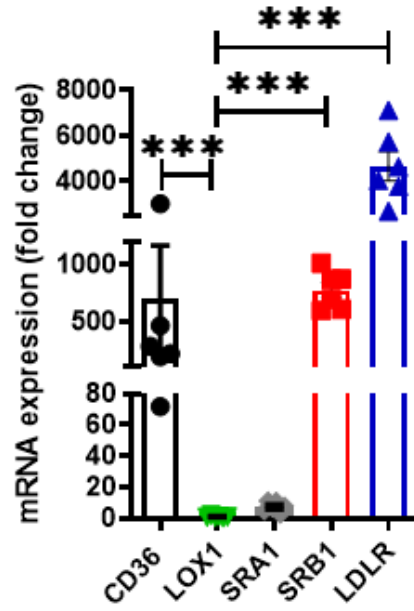

Supplementary Figure 4. Expression of various LDL receptors in LEC.
